# Supplementary material for: Deciphering the mechanism behind Fibroblast Growth Factor (FGF) induced biphasic signal-response profiles
Source: PubMed Central journal article supplement (PMC4036111; doi:10.1186/1478-811x-12-34), 2014-05-15

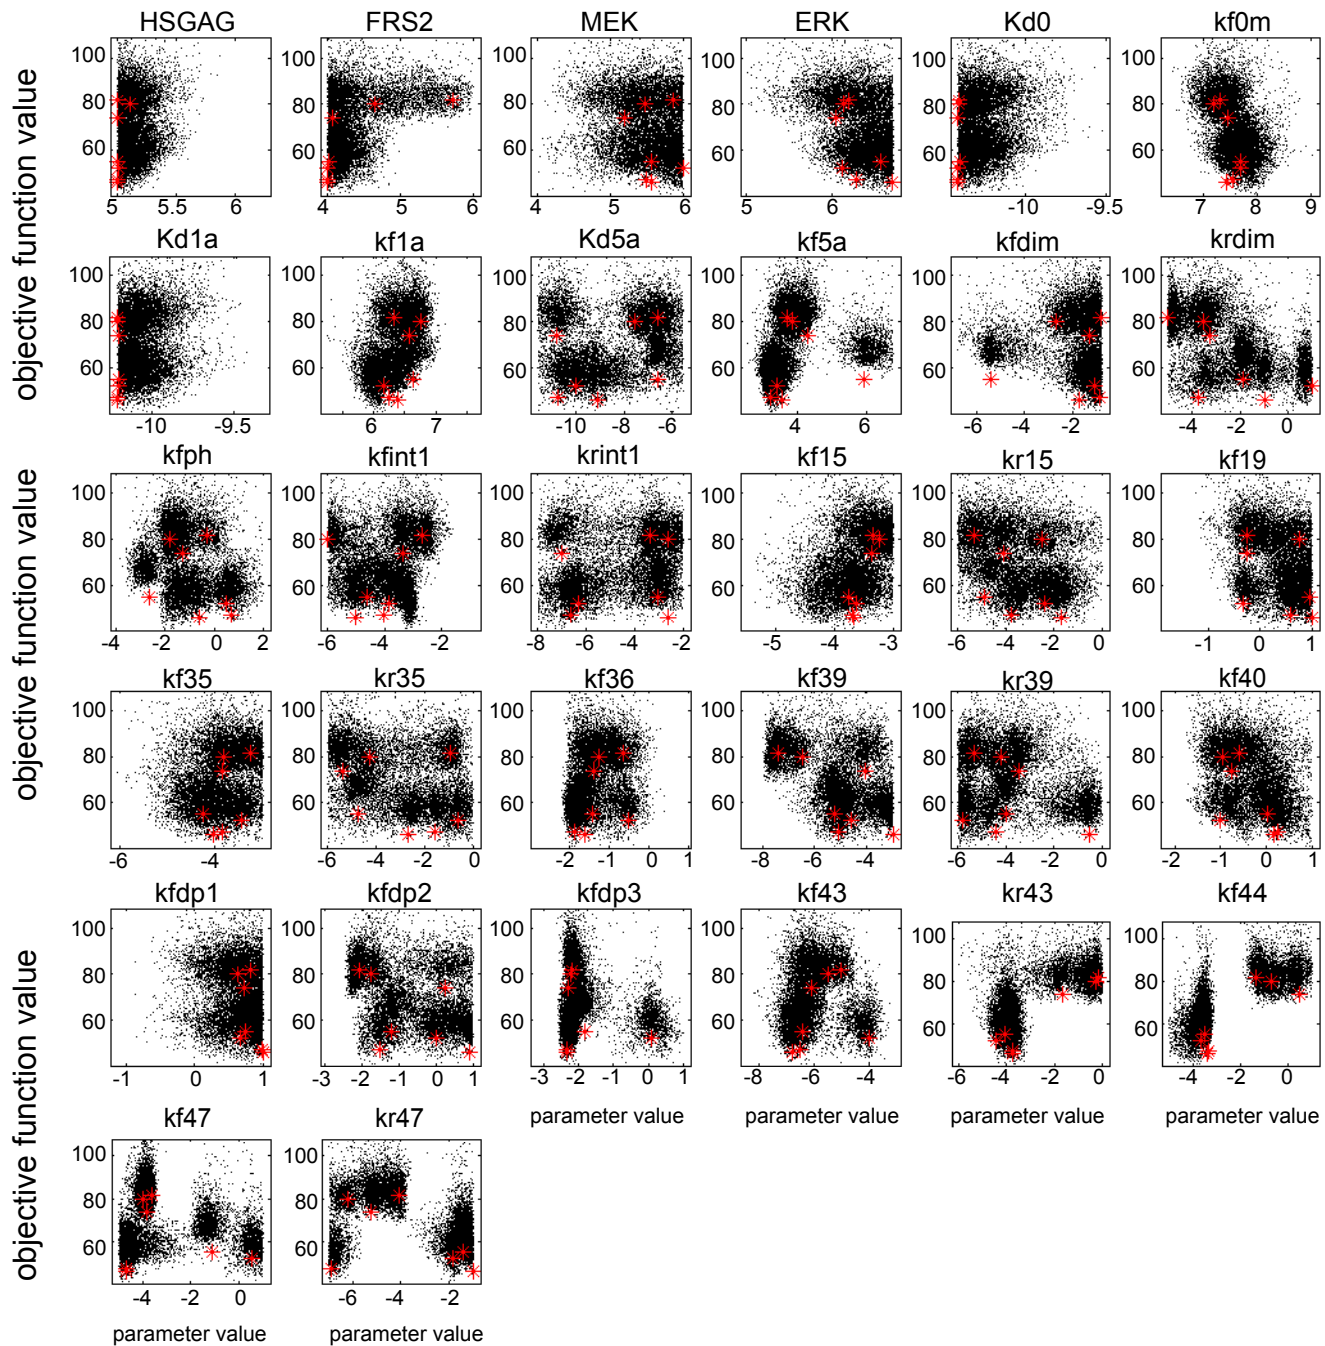

Supplement: 1478-811X-12-34-S2.pdf [file 1478-811X-12-34-S2.pdf]
